# Supplementary material for: Contribution of Milk Beverages to Nutrient Adequacy of Young Children and Preschool Children in the Philippines
Source: PubMed Central journal article supplement (PMC7071197; doi:10.3390/nu12020392), 2020-02-01
Supplement: nutrients-12-00392-s001.pdf [file nutrients-12-00392-s001.pdf]

**Supplementary Materials:** The following are available online at [www.mdpi.com/xxx/s1](http://www.mdpi.com/xxx/s1), Table S1: Nutritional compositions of YCM/PCM, Milk (fluid), Milk (powdered) considered in the current study

**Table S1: Nutritional compositions of YCMs, Milk (fluid), Milk (powdered) considered in the current study**

|                   | YCM/PCM <sup>1</sup> |        |       | Milk (Fluid) <sup>2</sup> |       |       | Milk (Powdered) <sup>3</sup> |        |       |
|-------------------|----------------------|--------|-------|---------------------------|-------|-------|------------------------------|--------|-------|
|                   | Min                  | Max    | Mean  | Min                       | Max   | Mean  | Min                          | Max    | Mean  |
| Energy (kcal)     | 410.0                | 510.0  | 449.9 | 43.3                      | 334.2 | 126.9 | 321.0                        | 508.0  | 433.6 |
| Protein (g)       | 5.8                  | 24.3   | 14.6  | 1.2                       | 8.5   | 4.8   | 7.9                          | 40.8   | 24.3  |
| Total fat (g)     | 5.3                  | 28.8   | 16.5  | 0.2                       | 9.5   | 4.3   | 0.8                          | 28.0   | 17.2  |
| Carbohydrates (g) | 38.0                 | 72.0   | 59.0  | 4.3                       | 59.3  | 17.4  | 37.8                         | 54.4   | 45.5  |
| Fibre (g)         | 0.0                  | 3.2    | 1.6   | 0.0                       | 0.8   | 0.1   | 0.0                          | 3.0    | 0.6   |
| Sodium (mg)       | 0.0                  | 300.0  | 185.7 | 21.7                      | 127.0 | 71.7  | 127.0                        | 495.8  | 332.7 |
| Calcium (mg)      | 483.0                | 940.0  | 734.4 | 39.0                      | 371.0 | 188.0 | 284.0                        | 1318.0 | 877.5 |
| Phosphorus (mg)   | 0.0                  | 740.0  | 392.5 | 30.0                      | 253.0 | 124.7 | 253.0                        | 949.0  | 661.1 |
| Iron (mg)         | 5.6                  | 10.0   | 7.4   | 0.1                       | 0.8   | 0.3   | 0.2                          | 5.4    | 1.8   |
| Magnesium (mg)    | 0.0                  | 104.0  | 54.1  | 0.0                       | 96.4  | 25.8  | 0.0                          | 110.1  | 66.4  |
| Potassium (mg)    | 0.0                  | 1400.0 | 632.3 | 2.1                       | 497.1 | 233.0 | 0.0                          | 1641.9 | 803.5 |
| Selenium (µg)     | 0.0                  | 15.0   | 6.2   | 0.0                       | 19.8  | 4.4   | 0.0                          | 16.2   | 6.6   |
| Zinc (mg)         | 0.0                  | 7.0    | 4.3   | 0.1                       | 1.6   | 0.6   | 0.0                          | 4.4    | 2.4   |
| Thiamin (mg)      | 0.0                  | 1.4    | 0.5   | 0.0                       | 0.7   | 0.1   | 0.3                          | 1.7    | 0.8   |
| Riboflavin (mg)   | 0.1                  | 1.8    | 0.9   | 0.1                       | 0.7   | 0.3   | 0.8                          | 1.7    | 1.4   |
| Niacin (mg)       | 0.0                  | 12.4   | 5.2   | 0.0                       | 3.6   | 0.4   | 0.3                          | 32.7   | 7.1   |
| Vitamin B6 (mg)   | 0.0                  | 1.3    | 0.5   | 0.0                       | 1.4   | 0.2   | 0.0                          | 0.4    | 0.1   |
| Vitamin B12 (mg)  | 0.0                  | 2.8    | 1.2   | 0.0                       | 2.9   | 0.5   | 0.0                          | 3.8    | 1.6   |
| Folate (µg)       | 0.0                  | 383.3  | 161.4 | 0.0                       | 18.0  | 6.5   | 0.0                          | 166.7  | 40.7  |
| Vitamin C (mg)    | 0.0                  | 81.0   | 46.8  | 0.0                       | 4.0   | 1.0   | 0.0                          | 104.0  | 27.6  |
| Vitamin D (µg)    | 3.5                  | 9.6    | 5.7   | 0.0                       | 1.0   | 0.2   | 0.0                          | 2.4    | 0.6   |
| Vitamin E (mg)    | 0.0                  | 7.7    | 3.9   | 0.0                       | 0.7   | 0.1   | 0.0                          | 4.0    | 1.1   |

<sup>1</sup> YCM/PCM includes 18 brands; <sup>2</sup> Milk (Fluid) includes evaporated milk, condensed milk, buttermilk, as well as cow's and goat's milk; <sup>3</sup> Milk (Powdered) includes skimmed, full cream, filled milk, and branded full fat powdered milks
